# Supplementary material for: Frequent Mobile Electronic Medical Records Users Respond More Quickly to Emergency Department Consultation Requests: Retrospective Quantitative Study
Source: PubMed Central journal article supplement (PMC7055754; doi:10.2196/14487), 2020-02-14
Supplement: mhealth_v8i2e14487_app1.pdf [file mhealth_v8i2e14487_app1.pdf]

**Multimedia Appendix 1.** Demographic characteristics of the patients receiving specialty consultations

| <b>Variables</b>                              |                            | <b>N</b>      | <b>%</b>   |
|-----------------------------------------------|----------------------------|---------------|------------|
| <b>Total patients</b>                         |                            | <b>14,225</b> | <b>100</b> |
| <b>Gender</b>                                 | Male                       | 7,460         | 52.4       |
|                                               | Female                     | 6,765         | 47.6       |
| <b>Age</b>                                    | < 19                       | 1,416         | 10         |
|                                               | 19 ~ 64                    | 7,445         | 52.3       |
|                                               | > 65                       | 5,364         | 37.7       |
| <b>Total consultation cases (visit cases)</b> |                            | <b>21,885</b> | <b>100</b> |
| <b>KTAS<sup>a</sup><br/>level</b>             | Level 1                    | 128           | 0.6        |
|                                               | Level 2                    | 1,886         | 8.6        |
|                                               | Level 3                    | 11,688        | 53.4       |
|                                               | Level 4                    | 7,438         | 34         |
|                                               | Level 5                    | 745           | 3.4        |
| <b>Visit<br/>reason</b>                       | Disease                    | 18,852        | 86.1       |
|                                               | Injury                     | 3,028         | 13.8       |
|                                               | Others                     | 5             | 0.1        |
| <b>Visit path</b>                             | Direct ED visit            | 16,000        | 73.1       |
|                                               | From other hospital        | 4,926         | 22.5       |
|                                               | From outpatient department | 940           | 4.3        |
|                                               | Others                     | 19            | 0.1        |
| <b>Visit<br/>method</b>                       | Ambulatory                 | 15,345        | 70.1       |
|                                               | EMS <sup>b</sup>           | 3,524         | 16.1       |
|                                               | Others                     | 3,004         | 13.8       |

<sup>a</sup>KTAS: Korean triage and acuity scale.

<sup>b</sup>EMS: emergency medical system.
