# Supplementary material for: Frequent Mobile Electronic Medical Records Users Respond More Quickly to Emergency Department Consultation Requests: Retrospective Quantitative Study
Source: PubMed Central journal article supplement (PMC7055754; doi:10.2196/14487), 2020-02-14
Supplement: mhealth_v8i2e14487_app2.pdf [file mhealth_v8i2e14487_app2.pdf]

**Multimedia Appendix 2.** Number of consultation cases by department.

| <b>Group</b>                  | <b>%</b>          | <b>Department</b>         | <b>Consultation(N)</b> |       |
|-------------------------------|-------------------|---------------------------|------------------------|-------|
| <b>Physician group</b>        |                   | Gastroenterology          | 1,365                  |       |
|                               |                   | Cardiology                | 1,087                  |       |
|                               |                   | Pulmonology               | 674                    |       |
|                               |                   | Endocrinology             | 98                     |       |
|                               | <b>42</b>         |                           | Nephrology             | 458   |
|                               |                   |                           | Hemato-oncology        | 581   |
|                               |                   |                           | Infection              | 811   |
|                               |                   |                           | Allergy                | 27    |
|                               |                   |                           | Rheumatology           | 67    |
|                               | Internal medicine | 3,976                     |                        |       |
| <b>Surgeon group</b>          |                   | Otolaryngology            | 1,689                  |       |
|                               |                   | Surgery                   | 1,878                  |       |
|                               |                   | Neurosurgery              | 1,165                  |       |
|                               |                   | Obstetrics and gynecology | 877                    |       |
|                               | <b>45</b>         |                           | Ophthalmology          | 1,079 |
|                               |                   |                           | Orthopedics            | 1,415 |
|                               |                   |                           | Plastic surgery        | 734   |
|                               |                   |                           | Thoracic surgery       | 429   |
|                               |                   |                           | Urology                | 672   |
| <b>OHBP<sup>a</sup> Group</b> |                   | Critical Care Medicine    | 409                    |       |
|                               |                   | Dental                    | 170                    |       |
|                               | <b>13</b>         |                           | Neurology              | 1,894 |
|                               |                   |                           | Psychiatry             | 519   |
|                               |                   |                           | Rehabilitation         | 9     |
|                               |                   |                           | Radiation Oncology     | 9     |
|                               |                   |                           | <b>21,885</b>          |       |

<sup>a</sup>OHBP: other hospital-based physician.
