# Supplementary material for: Frequent Mobile Electronic Medical Records Users Respond More Quickly to Emergency Department Consultation Requests: Retrospective Quantitative Study
Source: PubMed Central journal article supplement (PMC7055754; doi:10.2196/14487), 2020-02-14
Supplement: mhealth_v8i2e14487_app3.pdf [file mhealth_v8i2e14487_app3.pdf]

**Multimedia Appendix 3.** Comparison between high and low frequency users among specialty doctors who had left log record during the consultation completion interval.

|        | <b>High frequency users<br/>(&gt;2,834)</b> | <b>Low frequency users<br/>(&lt;2,834)</b> | <b><i>P</i> value</b> |
|--------|---------------------------------------------|--------------------------------------------|-----------------------|
| Median | 78min                                       | 84min                                      | 0.26                  |
| Mean   | 81min(±34.3)                                | 85min(±40.04)                              |                       |

High frequency user criteria: Median of Frequency (2,834)
